# Supplementary material
Source: publisher figshare collection journal article supplement (https://tandf.figshare.com/ndownloader/files/21974448)
Supplement: Supplementary file 1 [file 21974448]

**Supplemental table 1a – Endpoint classifications**

| **Event** | **ICD - codes** |
| --- | --- |
| Myocardial infarction | I21-I24 |
| Other arrhythmias | I44-47, I49, except I456 |
| Cerebrovascular disease | I60-I61, I621, I629, I63-I67, except I607A, I671+5+7 |
| Peripheral and central arterial disease | I70-74, N280, K551-K552, and K558-K559 |
| Atherosclerotic eye disease | H340-H342 |
| Sudden death | R96-99 |
| Angina pectoris | I20 |
| Atrial fibrillation | I48 |
| Heart failure | I50 |
| Transient cerebral ischemia | G45 |
| Chronic ischemic heart disease | I25 |

**Supplemental table 1b – Number of major adverse cardiovascular events**

| **Age group** | **41 or 51** | **61 or 71** |
| --- | --- | --- |
| No of subjects | 1188 | 722 |
| Cerebrovascular disease | 35 | 74 |
| Myocardial infarction | 39 | 35 |
| Peripheral and central arterial disease | 26 | 31 |
| Atrial fibrillation | 20 | 29 |
| Other arrhythmias | 16 | 28 |
| Sudden death | 11 | 16 |
| Transient cerebral ischemia | 16 | 9 |
| Heart failure | 2 | 15 |
| Chronic ischemic heart disease | 3 | 9 |
| Angina pectoris | 5 | 4 |
| Atherosclerotic eye disease | 0 | 2 |
| **Total events, %** | **173 (14.5)** | **252 (34.9)** |

**Supplemental table 2a – Model fit, overall and stratified in age groups**

|  | Overall | |  | Age 41 or 51 | |  | Age 61 or 71 | |
| --- | --- | --- | --- | --- | --- | --- | --- | --- |
|  | BIC | C-index |  | BIC | C-index |  | BIC | C-index |
| Model 1 | 4653 | 0.7147 |  | 1801 | 0.6808 |  | 2423 | 0.6456 |
| Model 2 | 4624 | 0.7139 |  | 1797 | 0.6839 |  | 2437 | 0.6328 |
| Model 3 | 4660 | 0.7165 |  | 1804 | 0.6857 |  | 2430 | 0.6446 |
| Model 4 | 4632 | 0.7303 |  | 1791 | 0.7045 |  | 2417 | 0.6578 |
| Model 5 | 4636 | 0.7306 |  | 1787 | 0.7075 |  | 2425 | 0.6505 |
| Model 6 | 4638 | 0.7316 |  | 1795 | 0.7074 |  | 2423 | 0.6571 |

**Supplemental table 2b - Model fit comparison:**

|  | Overall | | Age 41 or 51 | | Age 61 or 71 | |
| --- | --- | --- | --- | --- | --- | --- |
|  | Δ C-index | P-value | Δ C-index | P-value | Δ C-index | P-value |
| Model 2 - model 1 | -0.001 | 0.844 | 0.003 | 0.696 | -0.013 | 0.257 |
| Model 3 – model 1 | 0.018 | 0.093 | 0.005 | 0.414 | -0.001 | 0.421 |
| Model 4 – model 1 | 0.016 | 0.008 | 0.024 | 0.053 | 0.012 | 0.228 |
| Model 5- model 4 | 0.0003 | 0.907 | 0.003 | 0.543 | -0.007 | 0.356 |
| Model 6 – model 3 | 0.015 | 0.010 | 0.022 | 0.066 | 0.013 | 0.219 |

Abbreviations: BIC, Bayesian information criterion; C-index, Harrell's Concordance index; SBP, Systolic blood pressure

Model 1:Sex, age, total cholesterol, current SBP and smoking

Model 2: Sex, age, total cholesterol, antecedent SBP and smoking

Model 3: Sex, age, total cholesterol, current SBP, antecedent SBP and smoking

Model 4: Sex, age, total cholesterol, current SBP, smoking and HMOD

Model 5: Sex, age, total cholesterol, antecedent SBP, smoking and HMOD

Model 6: Sex, age, total cholesterol, current SBP, antecedent SBP, smoking and HMOD

**Supplemental figure 1 - Flowchart**

404 excluded due to known CVD

342 excluded due to missing data

N=1910

N=2314

1315 did not participate in both initial and follow-up visits

N=2656

Participants in 1982-1984

N=3971

836 declined to participate

4807 invited for population survey
